# Supplementary material for: Fe doped Ni5P4 nanosheet arrays with rich P vacancies via phase transformation for efficient overall water splitting
Source: Royal Society of Chemistry journal article supplement (doi:10.1039/c9nr10240j), 2020-01-01
Supplement: c9nr10240j1.pdf [file c9nr10240j1.pdf]

## Supporting Information

### **Fe doped Ni<sub>5</sub>P<sub>4</sub> nanosheet arrays with rich P vacancies *via* phase transformation for efficient overall water splitting**

*Junlei Qi,<sup>1</sup> Tianxiong Xu,<sup>1</sup> Jian Cao\*,<sup>1</sup> Shu Guo\*,<sup>2</sup> Zhengxiang Zhong\*,<sup>3</sup> Jicai Feng<sup>1</sup>*

## 1. Experimental Section

***Fabrication of NiFe-LDH nanosheets:*** Firstly, we heated the carbon paper (CP) to 500 °C for 2 h in a muffle furnace. Then, we dissolved 0.87 g Ni(NO<sub>3</sub>)<sub>2</sub> · 6H<sub>2</sub>O, 0.135 g Fe(NO<sub>3</sub>)<sub>3</sub> · 9H<sub>2</sub>O, 0.33 g NH<sub>3</sub>F and 0.9 g urea into 60 mL deionized water. After that, we put a piece of clean carbon paper into a 100 mL Teflon-lined stainless steel autoclave with the prepared solution, and heated the steel autoclave to 120 °C for 6 h. Finally, we washed the obtained carbon papers with NiFe-LDH nanosheet arrays by deionized water and ethanol for several times, and dried them at 60 °C overnight.

***Fabrication of NiSe<sub>2</sub>/Fe nanosheets:*** We heated the obtained NiFe-LDH nanosheets to 450 °C in a tube furnace under flowing Ar of 50 sccm, with 0.5 g Se at 400 °C in the upstream, and maintained that for 1 h.

***Fabrication of D-Ni<sub>5</sub>P<sub>4</sub>/Fe nanosheets:*** The D-Ni<sub>5</sub>P<sub>4</sub>/Fe-2, 2.5, 3, 3.5 samples were obtained in the following way. We heated the obtained NiSe<sub>2</sub>/Fe nanosheets to 400 °C in a tube furnace under flowing Ar, with 0.5 g NaH<sub>2</sub>PO<sub>2</sub> · H<sub>2</sub>O in the upstream as phosphorus source, and maintained that for different time (2 h, 2.5 h, 3 h, 3.5 h). The obtained samples were denoted as D-Ni<sub>5</sub>P<sub>4</sub>/Fe-2, 2.5, 3, 3.5 according to the corresponding time. The optimal sample was D-Ni<sub>5</sub>P<sub>4</sub>/Fe-3, shortly denoted as D-Ni<sub>5</sub>P<sub>4</sub>/Fe.

***Fabrication of Ni<sub>5</sub>P<sub>4</sub>/Fe nanosheets:*** We obtained the Ni<sub>5</sub>P<sub>4</sub>/Fe nanosheets in the same way of fabricating D-Ni<sub>5</sub>P<sub>4</sub>/Fe by using NiFe-LDH as substitute.

## 2. Sample characterization

We use transmission electron microscope (TEM, Tecnai G2 F30), scanning electronic microscopy (SEM, Helios Nanolab 600i), X-ray photoelectron spectroscopy (XPS, Thermo Fisher) and X-ray diffraction (XRD, D8 Advance) to characterize the obtained samples.

### 3. Electrochemical measurements

All electrochemical performances were measured in the electrochemical workstation (CHI 760E). The HER and OER properties were measured in a three-electrode system. The obtained samples, carbon rod and Hg/HgO were used as working electrode, counter electrode and reference electrode, respectively. All the potential was converted to reversible hydrogen electrode. The scanning rate of polarization curves is  $2 \text{ mV s}^{-1}$ , and then we compensated the polarization curves with iR-correction. Before tests, all samples were cycled at  $10 \text{ mV s}^{-1}$  until the stability of cyclic voltammetry (CV), then the data were collected. As a comparison, commercial Pt/C (20 wt% Pt) and IrO<sub>2</sub> were prepared on carbon paper, and the detailed process was referred to previous reseaches.<sup>[1,2]</sup> After all the measurement, the calculation of Tafel slope was conducted in the following way. Firstly, for both HER and OER, the potential at  $10 \text{ mA cm}^{-2}$  was read, shortly denoted as  $E_{10}$ . Next, an interval of about 0.04 V was selected around the  $E_{10}$  to obtain the optimal linear relationship between Log j and E (j represents the current density and E represents the potential vs. RHE). Finally, the fitting slopes of samples were compared. Besides, we normalized the current density by using the ECSA value ( $j_{\text{ECSA}}=j/\text{ECSA}$ ). The calculation formula of ECSA is as follows:

$$\text{ECSA}=(C_{\text{dl sample}}-C_{\text{dl CP}})/C_s$$

A specific capacitance ( $C_s$ ) value of  $0.040 \text{ mF/cm}^2$  in 1 M KOH was adopted.  $C_{\text{dl sample}}$  and  $C_{\text{dl CP}}$  refer to the the geometric double layer capacitance ( $C_{\text{dl}}$ ) of sample and carbon paper.

### Reference

1. Y. Chen, Z. Ren, H. Fu, X. Zhang, G. Tian, H. Fu, *Small* 2018, **14**, 1800763.

2. X. Xiao, D. Huang, Y. Fu, M. Wen, X. Jiang, X. Lv, M. Li, L. Gao, S. Liu, M. Wang, C. Zhao, Y. Shen, *ACS Appl. Mater. Interfaces* 2018, **10**, 4689-4696.

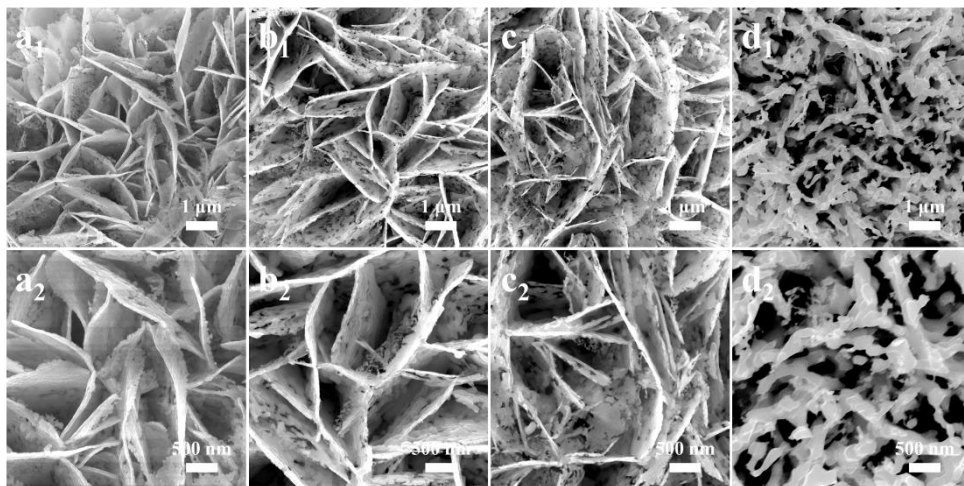

**Fig. S1** SEM images of (a) D-Ni<sub>5</sub>P<sub>4</sub>|Fe-2, (b) D-Ni<sub>5</sub>P<sub>4</sub>|Fe-2.5, (c) D-Ni<sub>5</sub>P<sub>4</sub>|Fe-3 and (d) D-Ni<sub>5</sub>P<sub>4</sub>|Fe-3.5.

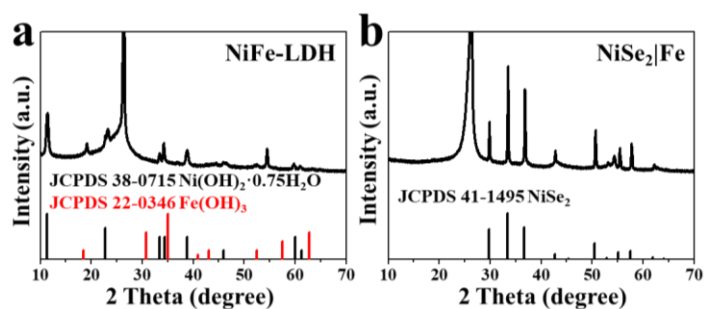

**Fig. S2** XRD patterns of (a) NiFe-LDH and (b) NiSe<sub>2</sub>|Fe.

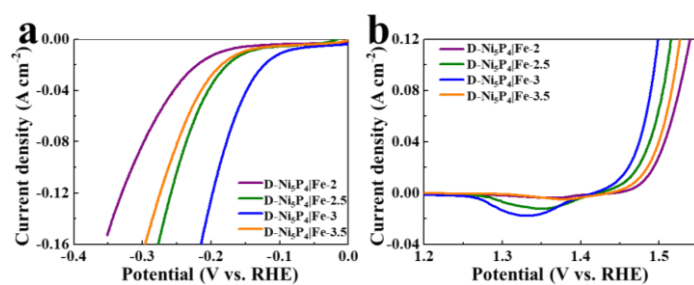

**Fig. S3** (a) HER and (b) OER performances of D-Ni<sub>5</sub>P<sub>4</sub>|Fe-2, 2.5, 3, 3.5.

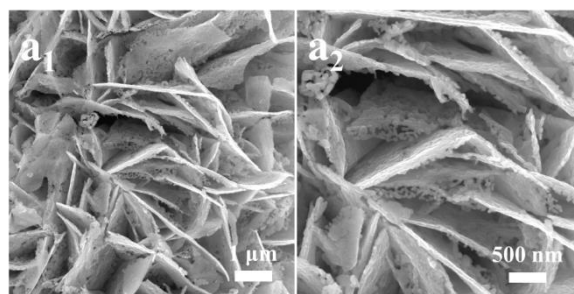

**Fig. S4** SEM images of D-Ni<sub>5</sub>P<sub>4</sub>|Fe after long time HER test.

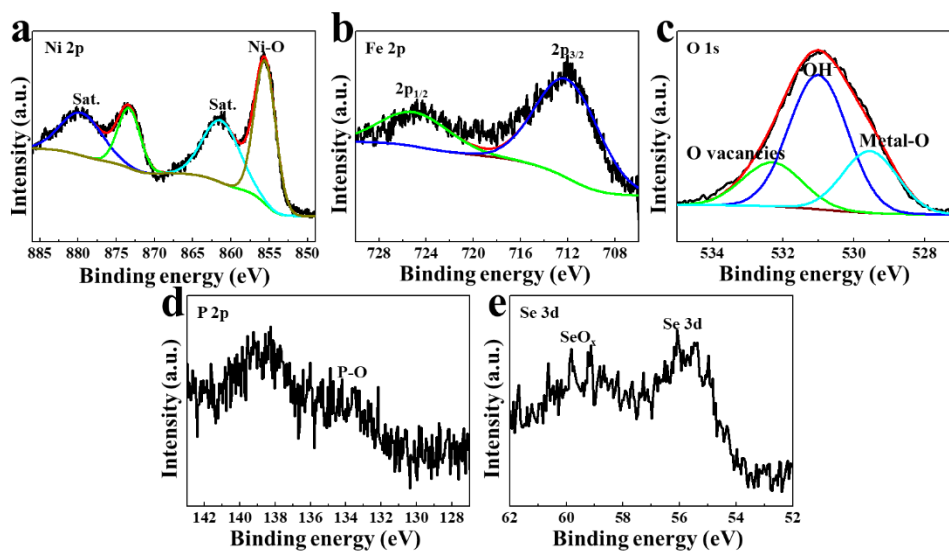

**Fig. S5** XPS (a) Ni 2p, (b) Fe 2p, (c) O 1s, (d) P 2p and (e) Se 3d spectra of D-Ni<sub>5</sub>P<sub>4</sub>|Fe after long time OER test.

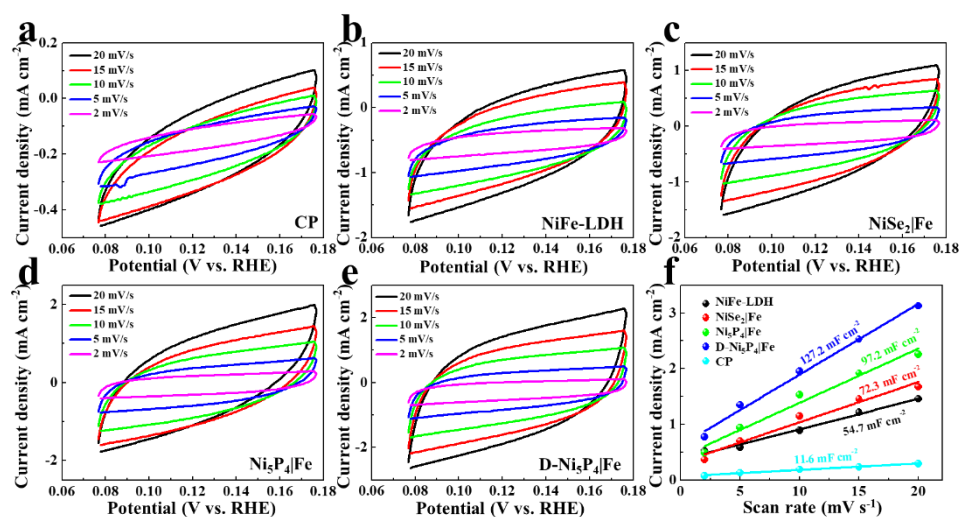

**Fig. S6** CV curves of obtained samples for estimating the  $C_{dl}$  in HER tests..

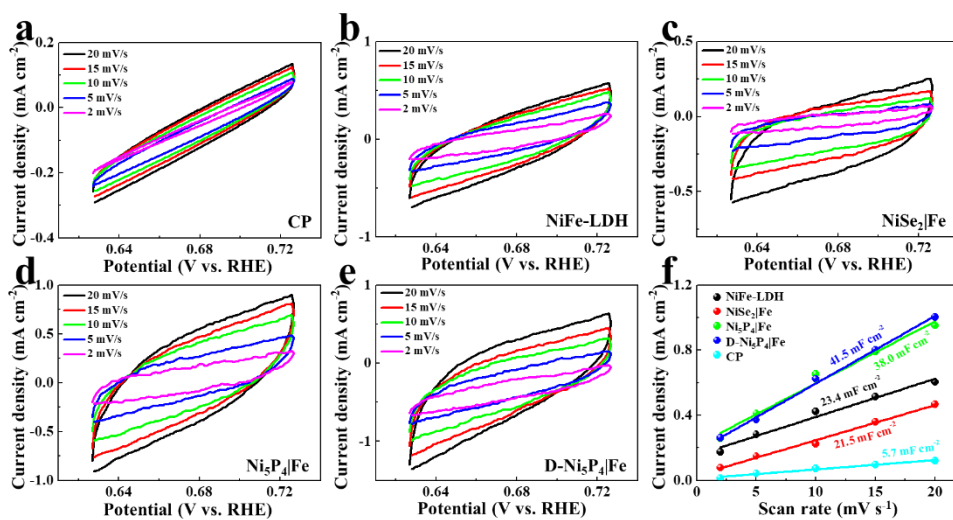

**Fig. S7** CV curves of obtained samples for estimating the  $C_{dl}$  in OER tests.

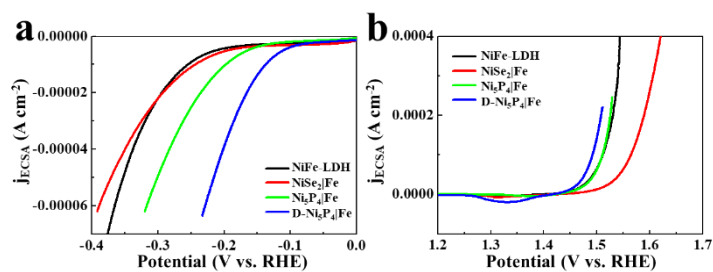

**Fig. S8** LSV curves normalized by  $C_{dl}$  of obtained samples.

**Table S1** Comparison of HER performances for D-Ni<sub>5</sub>P<sub>4</sub>|Fe nanosheets with previously reported electrocatalysts in the alkaline media.

| Electrocatalyst                                                     | Substrate    | Overpotential (mV)                      | Tafel slope (mV dec <sup>-1</sup> ) | Ref.                                                 |
|---------------------------------------------------------------------|--------------|-----------------------------------------|-------------------------------------|------------------------------------------------------|
| D-Ni <sub>5</sub> P <sub>4</sub>  Fe                                | Carbon paper | 95 at 10 mA cm <sup>-2</sup>            | 91.0                                | <b>This work</b>                                     |
| NiMoN                                                               | Carbon cloth | 109 at 10 mA cm <sup>-2</sup>           | 95                                  | <i>Adv. Energy Mater.</i> 2016, <b>11</b> , 1600221. |
| N-Ni <sub>3</sub> S <sub>2</sub> /VS <sub>2</sub>                   | Ni foam      | 151 at 10 mA cm <sup>-2</sup>           | 107.5                               | <i>Electrochim. Acta</i> 2018, <b>269</b> , 55       |
| Co-Ni <sub>3</sub> N                                                | Carbon cloth | 194 at 10 mA cm <sup>-2</sup>           | 156                                 | <i>Adv. Mater.</i> 2018, <b>13</b> , 1705516         |
| Fe <sub>17.5%</sub> -Ni <sub>3</sub> S <sub>2</sub>                 | Ni foam      | 142, 232 at 20, 100 mA cm <sup>-2</sup> | 95                                  | <i>ACS Catal.</i> 2018, <b>8</b> , 5431              |
| (Ni <sub>0.33</sub> Fe <sub>0.67</sub> ) <sub>2</sub> P             | Ni foam      | 214 at 50 mA cm <sup>-2</sup>           | 73.2                                | <i>Adv. Funct. Mater.</i> 2017, <b>37</b> , 1702513  |
| NiMoP <sub>2</sub>                                                  | Carbon cloth | 199 at 10 mA cm <sup>-2</sup>           | 112                                 | <i>J. Mater. Chem. A</i> 2017, <b>5</b> , 7197       |
| NiCoP nanocone                                                      | Ni foam      | 104 at 10 mA cm <sup>-2</sup>           | 54                                  | <i>J. Mater. Chem. A</i> 2017, <b>5</b> , 14828      |
| Ni-Co-P hollow nanobricks                                           | Powder       | 107 at 10 mA cm <sup>-2</sup>           | 46                                  | <i>Energy Environ. Sci.</i> 2018, <b>11</b> , 872    |
| Ni <sub>1.85</sub> Fe <sub>0.15</sub> P NSAs/NF                     | Ni foam      | 106 at 10 mA cm <sup>-2</sup>           | 89.7                                | <i>ACS Appl. Mater. Inter</i> 2017, <b>9</b> , 26001 |
| CoSe film                                                           | Ti mesh      | 121 at 10 mA cm <sup>-2</sup>           | 84                                  | <i>Chem. Commun.</i> 2015, <b>51</b> , 16683         |
| TiO <sub>2</sub> @Co <sub>9</sub> S <sub>8</sub> core-branch arrays | Ni foam      | 139 at 10 mA cm <sup>-2</sup>           | 65                                  | <i>Adv. Sci.</i> 2018, <b>5</b> , 1700772            |
| NiFe LDH@NiCoP                                                      | Ni foam      | 120 at 10 mA cm <sup>-2</sup>           | 88.2                                | <i>Adv. Funct. Mater.</i> 2018, <b>28</b> , 1706847. |

1. If not mentioned specifically, all overpotentials were corrected with iR compensation. 2. If not mentioned specifically, all electrocatalysts are directly synthesized on conductive substrates.



**Table S2** Comparison of OER performances for D-Ni<sub>5</sub>P<sub>4</sub>|Fe nanosheets with previously reported electrocatalysts in the alkaline media.

| Electrocatalyst                                                | Substrate               | Overpotential (mV)                                | Tafel slope (mV dec <sup>-1</sup> ) | Ref.                                                  |
|----------------------------------------------------------------|-------------------------|---------------------------------------------------|-------------------------------------|-------------------------------------------------------|
| D-Ni <sub>5</sub> P <sub>4</sub>  Fe                           | Carbon paper            | 217 at 10 mA cm <sup>-2</sup>                     | 45.7                                | <b>This work</b>                                      |
| Ni <sub>3</sub> S <sub>2</sub> /VS <sub>2</sub>                | Ni foam                 | 227 at 10 mA cm <sup>-2</sup>                     | 59.9                                | <i>Electrochim. Acta</i> 2018, <b>269</b> , 55        |
| CoS <sub>2</sub> nanotube                                      | Carbon cloth            | 276 at 10 mA cm <sup>-2</sup>                     | 81                                  | <i>Nanoscale Horiz.</i> 2017, <b>2</b> , 342          |
| Hyperbranched NiCoP Arrays                                     | Ni foam                 | 268 at 10 mA cm <sup>-2</sup>                     | 75                                  | <i>ACS Appl. Mater. Inter</i> 2018, <b>10</b> , 41237 |
| Co <sub>9</sub> S <sub>8</sub> /Ni <sub>3</sub> S <sub>2</sub> | Ni foam                 | 227 at 10 mA cm <sup>-2</sup>                     | 46.5                                | <i>Appl. Catal. B-Environ.</i> 2019, <b>253</b> , 246 |
| CoP <sub>2</sub> /RGO                                          | Glass carbon electrodes | 300 at 10 mA cm <sup>-2</sup>                     | 96                                  | <i>J. Mater. Chem. A</i> 2016, <b>4</b> , 4686-4690   |
| N-NiMoO <sub>4</sub> /NiS <sub>2</sub>                         | Carbon cloth            | 267, 335 at 10, 100 mA cm <sup>-2</sup>           | 44.3                                | <i>Adv. Funct. Mater.</i> 2019, <b>29</b> , 1805298   |
| Co <sub>5</sub> Mo <sub>1.0</sub> O nanosheets                 | Ni foam                 | 270 at 10 mA cm <sup>-2</sup>                     | 54.4                                | <i>Nano Energy</i> 2018, <b>45</b> , 448              |
| Co-Ni <sub>3</sub> N                                           | Carbon cloth            | 307 at 10 mA cm <sup>-2</sup>                     | 57                                  | <i>Adv. Mater.</i> 2018, <b>13</b> , 1705516          |
| plasma-assisted synthesized NiCoP                              | Ni foam                 | 280 at 10 mA cm <sup>-2</sup>                     | 87                                  | <i>Nano Lett.</i> 2016, <b>16</b> , 7718              |
| NiSe                                                           | Ni foam                 | 271, ~350, 380 at 10, 50, 100 mA cm <sup>-2</sup> | 80                                  | <i>J. Energy Chem.</i> 2017, <b>26</b> , 1217         |
| Ni <sub>3</sub> S <sub>2</sub> @MoS <sub>2</sub> /FeOOH        | Ni foam                 | 260 at 10 mA cm <sup>-2</sup>                     | 49                                  | <i>Appl. Catal. B</i> 2019, <b>244</b> , 1004         |

1.If not mentioned specifically, all overpotentials were corrected with iR compensation. 2. If not mentioned specifically, all electrocatalysts are directly synthesized on conductive substrates.

**Table S3** Comparison of water-splitting performances for D-Ni<sub>5</sub>P<sub>4</sub>|Fe nanosheets with previously reported electrocatalysts in the alkaline media.

| Electrocatalyst                                        | Substrate    | Potential                        | Ref.                                                |
|--------------------------------------------------------|--------------|----------------------------------|-----------------------------------------------------|
| D-Ni <sub>5</sub> P <sub>4</sub>  Fe                   | Carbon paper | 1.60 V at 10 mA cm <sup>-2</sup> | <b>This work</b>                                    |
| NiCo <sub>2</sub> P <sub>2</sub> /graphene quantum dot | Ti mesh      | 1.61 V at 10 mA cm <sup>-2</sup> | <i>Nano Energy</i> 2018, <b>48</b> , 284            |
| N-NiMoO <sub>4</sub> /NiS <sub>2</sub>                 | Carbon cloth | 1.60 V at 10 mA cm <sup>-2</sup> | <i>Adv. Funct. Mater.</i> 2019, <b>29</b> , 1805298 |
| NiMoP <sub>2</sub> nanowires                           | Carbon cloth | 1.67 V at 10 mA cm <sup>-2</sup> | <i>J. Mater. Chem. A</i> 2017, <b>5</b> , 7191      |
| NiCo <sub>2</sub> S <sub>4</sub> nanorod arrays        | Ni foam      | 1.64V at 20 mA cm <sup>-2</sup>  | <i>J. Power Sources</i> 2018, <b>402</b> , 116      |
| Ni <sub>2</sub> P                                      | Ni foam      | 1.63 V at 10 mA cm <sup>-2</sup> | <i>J. Energ. Chem.</i> 2017, <b>6</b> , 1196        |
| CuCo <sub>2</sub> O <sub>4</sub> -NWs                  | Ni foam      | 1.61 V at 10 mA cm <sup>-2</sup> | <i>Adv. Funct. Mater.</i> 2016, <b>26</b> , 8555    |
| Ni/NiP//Ni/NiP                                         | Ni foam      | 1.61 V at 10 mA cm <sup>-2</sup> | <i>Adv. Funct. Mater.</i> 2016, <b>26</b> , 3314    |
